# Supplementary material for: Lifetime cannabis use and childhood trauma increase risk of psychosis in carriers of CNR1 genetic variants: findings from the STREAM study
Source: PubMed Central journal article supplement — Braz J Psychiatry. 2023 Jun 8;45(3):226–35. doi: 10.47626/1516-4446-2022-2882 (PMC10288472; doi:10.47626/1516-4446-2022-2882), 2023-06-08
Supplement: bjp-45-03-226-s001.pdf [file bjp-45-03-226-s001.pdf]

<http://doi.org/10.47626/1516-4446-2022-2882>

Lifetime cannabis use and childhood trauma increase risk of psychosis in carriers of *CNR1* genetic variants: findings from the STREAM study - Loureiro CM et al.

**Table S1** Associations between the environmental risk factors in community-based controls and patients with first-episode psychosis

|                                  | Lifetime cannabis use, n (%) |                        | $\chi^2$ ; p-value <sup>1</sup> |
|----------------------------------|------------------------------|------------------------|---------------------------------|
|                                  | No                           | Yes                    |                                 |
| Childhood trauma, n (%)          |                              |                        |                                 |
| Community-based controls (n=286) |                              |                        |                                 |
| No                               | 184 (64.3) <sup>a</sup>      | 34 (12.0) <sup>b</sup> | <b>7.80; 0.008</b>              |
| Yes                              | 47 (16.4) <sup>a</sup>       | 21 (7.3) <sup>b</sup>  |                                 |
| Total                            | 231 (80.7)                   | 55 (19.3)              |                                 |
| FEPp (n=143)                     |                              |                        |                                 |
| No                               | 34 (23.8)                    | 35 (24.5)              | 0.06; 0.868                     |
| Yes                              | 38 (26.5)                    | 36 (25.2)              |                                 |
| Total                            | 72 (50.3)                    | 71 (49.7)              |                                 |

FEPp = first-episode psychosis patients.

Bold type denotes statistically significant results.

<sup>†</sup> Fisher's exact test.

<sup>a,b</sup> Different superscript letters denote statistically significant differences between means.

**Table S2** Genotype frequencies between FEPp and controls and the risk effects of the NMDAR, D2R, and CB1R SNVs in psychosis using a dominant model

| SNVs: dominant model      | Variant  | Controls<br>(n=286)<br>n (%) <sup>†</sup> | FEPp<br>(n=143) | Association with psychosis |                       |
|---------------------------|----------|-------------------------------------------|-----------------|----------------------------|-----------------------|
|                           |          |                                           |                 | Unadjusted <sup>a</sup>    | Adjusted <sup>b</sup> |
|                           |          |                                           |                 | β (95%CI); p               |                       |
| <b>GRIN1<sup>‡</sup></b>  |          |                                           |                 |                            |                       |
| rs4880213 (C>T)           | CC       | 83 (29.0)                                 | 35 (24.5)       | 1.00                       | 1.00                  |
|                           | CT or TT | 203 (71.0)                                | 108 (75.5)      | 1.3 (0.8-2.0); 0.321       | 1.2 (0.7-2.2); 0.455  |
| rs11146020 (G>C)          | GG       | 239 (83.6)                                | 117 (81.8)      | 1.00                       | 1.00                  |
|                           | GC or CC | 47 (16.4)                                 | 26 (18.2)       | 1.1 (0.7-1.9); 0.650       | 1.1 (0.6-2.2); 0.755  |
| <b>GRIN2A<sup>‡</sup></b> |          |                                           |                 |                            |                       |
| rs1420040 (A>G)           | AA       | 109 (38.1)                                | 49 (34.3)       | 1.00                       | 1.00                  |
|                           | AG or GG | 177 (61.9)                                | 94 (65.7)       | 1.2 (0.8-1.8); 0.436       | 1.4 (0.8-2.3); 0.220  |
| rs11866328 (G>T)          | GG       | 103 (36.0)                                | 55 (38.5)       | 1.00                       | 1.00                  |
|                           | TG or TT | 183 (64.0)                                | 88 (61.5)       | 0.9 (0.6-1.4); 0.620       | 0.9 (0.6-1.6); 0.772  |
| <b>GRIN2B<sup>‡</sup></b> |          |                                           |                 |                            |                       |
| rs890 (A>C)               | AA       | 82 (28.7)                                 | 55 (38.5)       | 1.00                       | 1.00                  |
|                           | AC or CC | 204 (71.3)                                | 88 (61.5)       | 0.6 (0.4-1.0); 0.041       | 0.6 (0.4-1.0); 0.073  |
| rs7298664 (T>C)           | TT       | 212 (74.1)                                | 100 (69.9)      | 1.00                       | 1.00                  |
|                           | TC or CC | 74 (25.9)                                 | 43 (30.1)       | 1.2 (0.8-1.9); 0.358       | 1.2 (0.7-2.0); 0.564  |
| rs2098469 (T>G)           | TT       | 235 (82.2)                                | 111 (77.6)      | 1.00                       | 1.00                  |
|                           | TG or GG | 51 (17.8)                                 | 32 (22.4)       | 1.3 (0.8-2.2); 0.262       | 1.4 (0.8-2.7); 0.265  |
| <b>DRD2<sup>‡</sup></b>   |          |                                           |                 |                            |                       |
| rs1799978 (T>C)           | TT       | 244 (85.3)                                | 115 (80.4)      | 1.00                       | 1.00                  |
|                           | TG or CC | 42 (14.7)                                 | 28 (19.6)       | 1.4 (0.8-2.4); 0.197       | 1.9 (1.0-3.6); 0.061  |
| rs7131056 (C>A)           | CC       | 107 (37.4)                                | 55 (38.5)       | 1.00                       | 1.00                  |
|                           | AC or AA | 179 (62.6)                                | 88 (61.5)       | 1.0 (0.6-1.4); 0.833       | 0.8 (0.5-1.3); 0.355  |
| rs6275 (G>A)              | GG       | 117 (40.9)                                | 48 (33.6)       | 1.00                       | 1.00                  |
|                           | AG or AA | 169 (59.1)                                | 95 (66.4)       | 1.4 (0.9-2.1); 0.141       | 1.5 (0.9-2.4); 0.147  |
| <b>CNR1<sup>‡</sup></b>   |          |                                           |                 |                            |                       |
| rs806380 (A>G)            | AA       | 154 (53.8)                                | 85 (59.4)       | 1.00                       | 1.00                  |
|                           | AG or GG | 132 (46.2)                                | 58 (40.6)       | 0.8 (0.5-1.2); 0.272       | 0.7 (0.4-1.2); 0.169  |
| rs806379 (A>T)            | AA       | 92 (32.2)                                 | 44 (30.8)       | 1.00                       | 1.00                  |
|                           | AT or TT | 194 (67.8)                                | 99 (69.2)       | 1.1 (0.7-1.6); 0.769       | 1.2 (0.7-2.0); 0.592  |

|                  |          |            |            |                      |                      |
|------------------|----------|------------|------------|----------------------|----------------------|
| rs1049353 (C>T)  | CC       | 186 (65.0) | 95 (66.4)  | 1.00                 | 1.00                 |
|                  | CT or TT | 100 (35.0) | 48 (33.6)  | 0.9 (0.6-1.4); 0.774 | 1.1 (0.6-1.8); 0.815 |
| rs6454674 (T>G)  | TT       | 144 (50.3) | 72 (50.3)  | 1.00                 | 1.00                 |
|                  | GT or GG | 142 (49.7) | 71 (49.7)  | 1.0 (0.7-1.5); 1.000 | 0.8 (0.5-1.2); 0.268 |
| rs1535255 (T>G)  | TT       | 194 (67.8) | 85 (59.4)  | 1.00                 | 1.00                 |
|                  | GT or GG | 92 (32.2)  | 58 (40.6)  | 1.4 (0.9-2.2); 0.086 | 2.0 (1.2-3.4); 0.008 |
| rs2023239 (T>C)  | TT       | 194 (67.8) | 86 (60.1)  | 1.00                 | 1.00                 |
|                  | CT or CC | 92 (32.2)  | 57 (39.9)  | 1.4 (0.9-2.1); 0.155 | 2.0 (1.2-3.4); 0.009 |
| rs12720071 (T>C) | TT       | 242 (84.6) | 117 (81.8) | 1.00                 | 1.00                 |
|                  | TC or CC | 44 (15.4)  | 26 (18.2)  | 0.8 (0.5-1.4); 0.460 | 1.5 (0.8-3.0); 0.248 |
| rs6928499 (G>C)  | GG       | 194 (67.8) | 86 (60.1)  | 1.00                 | 1.00                 |
|                  | GC or CC | 92 (32.2)  | 57 (39.9)  | 1.4 (0.9-2.1); 0.115 | 2.0 (1.2-3.4); 0.009 |
| rs806374 (T>C)   | TT       | 113 (39.5) | 45 (31.5)  | 1.00                 | 1.00                 |
|                  | CT or CC | 173 (60.5) | 98 (68.5)  | 1.4 (0.9-2.2); 0.104 | 1.7 (1.0-3.0); 0.042 |
| rs7766029 (T>C)  | TT       | 89 (31.1)  | 49 (34.3)  | 1.00                 | 1.00                 |
|                  | TC or CC | 197 (68.9) | 94 (65.7)  | 0.9 (0.6-1.3); 0.511 | 0.8 (0.5-1.4); 0.533 |
| rs806378 (C>T)   | CC       | 173 (60.5) | 94 (65.7)  | 1.00                 | 1.00                 |
|                  | CT or TT | 113 (39.5) | 49 (34.3)  | 0.8 (0.5-1.2); 0.291 | 0.7 (0.4-1.2); 0.180 |
| rs10485170 (T>C) | TT       | 221 (77.3) | 102 (71.3) | 1.00                 | 1.00                 |
|                  | CT or CC | 65 (22.7)  | 41 (28.7)  | 1.4 (0.9-2.2); 0.179 | 2.1 (1.2-3.7); 0.012 |
| rs9450898 (T>C)  | TT       | 195 (68.2) | 88 (61.5)  | 1.00                 | 1.00                 |
|                  | CT or CC | 91 (31.8)  | 55 (38.5)  | 1.3 (0.9-2.0); 0.172 | 1.8 (1.1-3.1); 0.024 |

SNVs = single nucleotide variants; FEPP = first-episode psychosis patients; 1.00 = reference category;  $\beta$  = beta coefficient.

† Genotype frequency difference assessed by chi-square test.

‡ Genotype frequencies analyzed under dominant model (homozygous ancestral versus heterozygous + minor allele homozygous).

<sup>a</sup> Unadjusted: binary logistic regression model including a binary outcome (community-based controls and FEPP). If  $\alpha \leq 0.20$ , to univariate model as significant.

<sup>b</sup> Adjusted: binary logistic regression model including a binary outcome (community-based controls and FEPP).  $\beta$  adjusted by covariates sex, age, first 10 PCs, years of education, and tobacco smoking. For multiple test errors, Bonferroni's test was used, and an adjusted p-value < 0.002 (0.05/23 SNVs) was considered statistically significant.

**Table S3** Genotype frequencies between FEPp and controls and the risk effects of the NMDAR, D2R, and CB1R SNVs in psychosis using an additive model

| SNVs: additive model      | Variant | Controls<br>(n=286) | FEPp<br>(n=143) | Association with psychosis |                       |
|---------------------------|---------|---------------------|-----------------|----------------------------|-----------------------|
|                           |         |                     |                 | Unadjusted <sup>a</sup>    | Adjusted <sup>b</sup> |
|                           |         | n (%) <sup>†</sup>  |                 | $\beta$ (95%CI); p         |                       |
| <b>GRIN1<sup>‡</sup></b>  |         |                     |                 |                            |                       |
| rs4880213 (C>T)           | CC      | 83 (29.0)           | 35 (24.5)       | 1.00                       | 1.00                  |
|                           | CT      | 147 (51.4)          | 79 (55.2)       | 1.3 (0.8-2.1); 0.322       | 1.2 (0.7-2.2); 0.463  |
|                           | TT      | 56 (19.6)           | 29 (20.3)       | 1.2 (0.7-2.2); 0.500       | 1.2 (0.6-2.5); 0.600  |
| rs11146020 (G>C)          | GG      | 239 (83.6)          | 117 (81.8)      | 1.00                       | 1.00                  |
|                           | GC      | 45 (15.7)           | 25 (17.5)       | 1.1 (0.7-1.9); 0.644       | 1.1 (0.6-2.2); 0.749  |
|                           | CC      | 2 (0.7)             | 1 (0.7)         | 1.0 (1.0-11.4); 0.986      | 1.0 (0.1-14.5); 0.992 |
| <b>GRIN2A<sup>‡</sup></b> |         |                     |                 |                            |                       |
| rs1420040 (A>G)           | AA      | 109 (38.1)          | 49 (34.3)       | 1.00                       | 1.00                  |
|                           | AG      | 125 (43.7)          | 70 (49.0)       | 1.2 (0.8-2.0); 0.335       | 1.5 (0.8-2.5); 0.169  |
|                           | GG      | 52 (18.2)           | 24 (16.8)       | 1.0 (0.6-1.9); 0.930       | 1.2 (0.6-2.4); 0.678  |
| rs11866328 (G>T)          | GG      | 103 (36.0)          | 55 (38.5)       | 1.00                       | 1.00                  |
|                           | TG      | 147 (51.4)          | 66 (46.2)       | 0.8 (0.5-1.3); 0.437       | 0.8 (0.5-1.4); 0.419  |
|                           | TT      | 36 (8.4)            | 22 (15.4)       | 1.1 (0.6-2.1); 0.671       | 1.7 (0.8-3.7); 0.205  |
| <b>GRIN2B<sup>‡</sup></b> |         |                     |                 |                            |                       |
| rs890 (A>C)               | AA      | 82 (28.7)           | 55 (38.5)       | 1.00                       | 1.00                  |
|                           | AC      | 146 (51.0)          | 62 (43.4)       | 0.6 (0.4-1.0); 0.048       | 0.6 (0.3-1.0); 0.049  |
|                           | CC      | 58 (20.3)           | 26 (18.2)       | 0.7 (0.4-1.2); 0.170       | 0.8 (0.4-1.5); 0.446  |
| rs7298664 (T>C)           | TT      | 212 (74.1)          | 100 (69.9)      | 1.00                       | 1.00                  |
|                           | TC      | 68 (23.8)           | 37 (8.6)        | 1.2 (0.7-1.8); 0.548       | 1.1 (0.6-1.9); 0.851  |
|                           | CC      | 6 (2.1)             | 6 (4.2)         | 2.1 (0.7-6.7); 0.203       | 4.8 (0.8-30.9); 0.095 |
| rs2098469 (T>G)           | TT      | 235 (82.2)          | 111 (77.6)      | 1.00                       | 1.00                  |
|                           | TG      | 48 (16.8)           | 30 (21.0)       | 1.3 (0.8-2.2); 0.281       | 1.5 (0.8-2.9); 0.197  |
|                           | GG      | 3 (1.0)             | 2 (1.4)         | 1.4 (0.2-8.6); 0.708       | 0.5 (0.1-5.4); 0.530  |
| <b>DRD2<sup>‡</sup></b>   |         |                     |                 |                            |                       |
| rs1799978 (T>C)           | TT      | 244 (85.3)          | 115 (80.4)      | 1.00                       | 1.00                  |
|                           | TG      | 41 (14.3)           | 26 (18.2)       | 1.3 (0.8-2.3); 0.281       | 1.8 (0.9-3.5); 0.083  |
|                           | CC      | 1 (0.3)             | 2 (1.4)         | 4.2 (0.4-47.3); 0.240      | 8.5 (0.1-0.1); 0.999  |
| rs7131056 (C>A)           | CC      | 107 (37.4)          | 55 (38.5)       | 1.00                       | 1.00                  |
|                           | AC      | 138 (48.3)          | 60 (42.0)       | 0.8 (0.5-1.3); 0.460       | 0.7 (0.4-1.3); 0.264  |
|                           | AA      | 41 (14.3)           | 28 (19.6)       | 1.3 (0.7-2.4); 0.337       | 1.0 (0.5-2.0); 0.937  |

<http://doi.org/10.47626/1516-4446-2022-2882>

Lifetime cannabis use and childhood trauma increase risk of psychosis in carriers of *CNR1* genetic variants: findings from the STREAM study - Loureiro CM et al.

|                         |    |            |            |                      |                       |
|-------------------------|----|------------|------------|----------------------|-----------------------|
| rs6275 (G>A)            | GG | 117 (40.9) | 48 (33.6)  | 1.00                 | 1.00                  |
|                         | AG | 132 (46.2) | 66 (46.2)  | 1.2 (0.8-1.9); 0.386 | 1.3 (0.7-2.2); 0.411  |
|                         | AA | 37 (12.9)  | 29 (20.3)  | 1.9 (1.1-4.5); 0.032 | 2.2 (1.1-4.4); 0.036  |
| <b>CNR1<sup>†</sup></b> |    |            |            |                      |                       |
| rs806380 (A>G)          | AA | 154 (53.8) | 85 (59.4)  | 1.00                 | 1.00                  |
|                         | AG | 117 (40.9) | 50 (35.0)  | 0.8 (0.5-1.2); 0.237 | 0.7 (0.4-1.1); 0.121  |
|                         | GG | 15 (5.2)   | 8 (5.6)    | 1.0 (0.4-2.4); 0.940 | 1.2 (0.4-4.0); 0.781  |
| rs806379 (A>T)          | AA | 92 (32.2)  | 44 (30.8)  | 1.00                 | 1.00                  |
|                         | AT | 148 (51.7) | 69 (48.3)  | 1.0 (0.6-1.5); 0.913 | 0.9 (0.5-1.6); 0.786  |
|                         | TT | 46 (16.1)  | 30 (21.0)  | 1.4 (0.8-2.4); 0.298 | 2.3 (1.1-4.8); 0.029  |
| rs1049353 (C>T)         | CC | 186 (65.0) | 95 (66.4)  | 1.00                 | 1.00                  |
|                         | CT | 90 (31.5)  | 45 (31.5)  | 1.0 (0.6-1.5); 0.924 | 1.1 (0.6-1.8); 0.822  |
|                         | TT | 10 (3.5)   | 3 (2.1)    | 0.6 (0.2-2.2); 0.427 | 1.1 (0.2-5.2); 0.927  |
| rs6454674 (T>G)         | TT | 144 (50.3) | 72 (50.3)  | 1.00                 | 1.00                  |
|                         | GT | 110 (38.5) | 57 (39.9)  | 1.0 (0.7-1.6); 0.870 | 0.7 (0.4-1.3); 0.275  |
|                         | GG | 32 (11.2)  | 14 (9.8)   | 0.9 (0.4-1.7); 0.704 | 0.8 (0.3-1.8); 0.585  |
| rs1535255 (T>G)         | TT | 194 (67.8) | 85 (59.4)  | 1.00                 | 1.00                  |
|                         | GT | 83 (29.0)  | 49 (34.3)  | 1.3 (0.9-2.1); 0.180 | 1.9 (1.1-3.2); 0.025  |
|                         | GG | 9 (3.1)    | 9 (6.3)    | 2.3 (0.9-6.0); 0.092 | 4.8 (1.1-20.4); 0.034 |
| rs2023239 (T>C)         | TT | 194 (67.8) | 86 (60.1)  | 1.00                 | 1.00                  |
|                         | CT | 83 (29.0)  | 49 (34.3)  | 1.3 (0.9-2.1); 0.197 | 1.8 (1.1-3.2); 0.027  |
|                         | CC | 9 (3.1)    | 8 (5.6)    | 2.0 (0.7-5.4); 0.167 | 4.6 (1.1-19.6); 0.042 |
| rs12720071 (T>C)        | TT | 242 (84.6) | 117 (81.8) | 1.00                 | 1.00                  |
|                         | TC | 41 (14.3)  | 25 (17.5)  | 1.3 (0.7-2.2); 0.403 | 1.6 (0.8-3.3); 0.176  |
|                         | CC | 3 (1.0)    | 1 (0.7)    | 0.7 (0.1-6.7); 0.749 | 0.5 (0.1-6.2); 0.563  |
| rs6928499 (G>C)         | GG | 194 (67.8) | 86 (60.1)  | 1.00                 | 1.00                  |
|                         | GC | 84 (29.4)  | 49 (34.3)  | 1.3 (0.9-2.0); 0.215 | 1.8 (1.0-3.1); 0.037  |
|                         | CC | 8 (2.8)    | 8 (5.6)    | 2.3 (0.8-6.2); 0.115 | 7.9 (1.5-41.9); 0.016 |
| rs806374 (T>C)          | TT | 113 (39.5) | 45 (31.5)  | 1.00                 | 1.00                  |
|                         | CT | 126 (44.1) | 72 (50.3)  | 1.4 (0.9-2.3); 0.116 | 1.7 (1.0-3.0); 0.049  |
|                         | CC | 47 (16.4)  | 26 (18.2)  | 1.4 (0.8-2.5); 0.275 | 1.7 (0.8-3.6); 0.561  |
| rs7766029 (T>C)         | TT | 89 (31.1)  | 49 (34.3)  | 1.00                 | 1.00                  |
|                         | TC | 145 (50.7) | 63 (44.1)  | 0.8 (0.5-1.2); 0.310 | 0.7 (0.4-1.2); 0.219  |
|                         | CC | 52 (18.2)  | 31 (21.7)  | 1.1 (0.6-1.9); 0.783 | 1.3 (0.7-2.7); 0.427  |

<http://doi.org/10.47626/1516-4446-2022-2882>

|                  |    |            |            |                      |                       |
|------------------|----|------------|------------|----------------------|-----------------------|
| rs806378 (C>T)   | CC | 173 (60.5) | 94 (65.7)  | 1.00                 | 1.00                  |
|                  | CT | 104 (36.4) | 42 (29.4)  | 0.7 (0.5-1.2); 0.184 | 0.7 (0.4-1.1); 0.104  |
|                  | TT | 9 (3.1)    | 7 (4.9)    | 1.4 (0.5-4.0); 0.490 | 1.8 (0.5-7.0); 0.399  |
| rs10485170 (T>C) | TT | 221 (77.3) | 102 (71.3) | 1.00                 | 1.00                  |
|                  | CT | 60 (21.0)  | 37 (25.9)  | 1.3 (0.8-2.1); 0.229 | 1.9 (1.1-3.5); 0.027  |
|                  | CC | 5 (1.7)    | 4 (2.8)    | 1.7 (0.5-6.6); 0.420 | 5.7 (0.7-47.2); 0.107 |
| rs9450898 (T>C)  | TT | 195 (68.2) | 88 (61.5)  | 1.00                 | 1.00                  |
|                  | CT | 82 (28.7)  | 49 (34.3)  | 1.3 (0.9-2.0); 0.205 | 1.7 (1.0-2.9); 0.060  |
|                  | CC | 9 (3.1)    | 6 (4.2)    | 1.5 (0.5-4.3); 0.472 | 5.5 (1.0-28.9); 0.044 |

SNVs = single nucleotide variants; FEPp = first-episode psychosis patients; 1.00 = reference category;  $\beta$  = beta coefficient.

<sup>†</sup> Genotype frequency difference assessed by chi-square test.

<sup>‡</sup> Genotype frequencies analyzed under additive model (homozygous ancestral versus heterozygous versus minor allele homozygous).

<sup>a</sup> Unadjusted: binary logistic regression model including a binary outcome (community-based controls and FEPp). If  $\alpha \leq 0.20$ , to univariate model as significant.

<sup>b</sup> Adjusted: binary logistic regression model including a binary outcome (community-based controls and FEPp).  $\beta$  adjusted by covariates sex, age, first 10 PCs, years of education, and tobacco smoking. For multiple test errors, Bonferroni's test was used, and an adjusted p-value < 0.002 (0.05/23 SNVs) was considered statistically significant.

**Table S4** Genotype frequencies between FEPp and controls and the risk effects of the NMDAR, D2R, and CB1R SNVs in psychosis using a recessive model

| SNVs: recessive model            | Variant  | Controls<br>(n=286) | FEPp<br>(n=143) | Association with psychosis |                       |
|----------------------------------|----------|---------------------|-----------------|----------------------------|-----------------------|
|                                  |          |                     |                 | Unadjusted <sup>a</sup>    | Adjusted <sup>b</sup> |
|                                  |          | n (%) <sup>†</sup>  |                 | $\beta$ (95%CI); p         |                       |
| <b><i>GRIN1</i><sup>‡</sup></b>  |          |                     |                 |                            |                       |
| rs4880213 (C>T)                  | CC or CT | 230 (80.4)          | 114 (79.7)      | 1.00                       | 1.00                  |
|                                  | TT       | 56 (19.6)           | 29 (20.3)       | 1.0 (0.6-1.7); 0.864       | 1.0 (0.6-1.9); 0.878  |
| rs11146020 (G>C)                 | GG or GC | 284 (99.3)          | 142 (99.3)      | 1.00                       | 1.00                  |
|                                  | CC       | 2 (0.7)             | 1 (0.7)         | 1.0 (0.1-11.1); 1.000      | 1.0 (0.1-14.2); 0.996 |
| <b><i>GRIN2A</i><sup>‡</sup></b> |          |                     |                 |                            |                       |
| rs1420040 (A>G)                  | AA or AG | 233 (81.8)          | 119 (83.2)      | 1.00                       | 1.00                  |
|                                  | GG       | 52 (18.2)           | 24 (16.8)       | 0.9 (0.5-1.5); 0.709       | 1.2 (0.6-2.3); 0.604  |
| rs11866328 (G>T)                 | GG or TG | 250 (87.4)          | 121 (84.6)      | 1.00                       | 1.00                  |
|                                  | TT       | 36 (12.6)           | 22 (15.4)       | 1.3 (0.7-2.2); 0.425       | 1.9 (0.9-4.0); 0.082  |
| <b><i>GRIN2B</i><sup>‡</sup></b> |          |                     |                 |                            |                       |
| rs890 (A>C)                      | AA or AC | 228 (79.7)          | 117 (81.8)      | 1.00                       | 1.00                  |
|                                  | CC       | 58 (20.3)           | 26 (18.2)       | 0.9 (0.5-1.5); 0.606       | 1.1 (0.6-2.0); 0.840  |
| rs7298664 (T>C)                  | TT or TC | 280 (97.9)          | 137 (95.8)      | 1.00                       | 1.00                  |
|                                  | CC       | 6 (2.1)             | 6 (4.2)         | 2.0 (0.6-6.5); 0.223       | 4.8 (0.8-30.2); 0.097 |
| rs2098469 (T>G)                  | TT or TG | 282 (99.0)          | 141 (98.6)      | 1.00                       | 1.00                  |
|                                  | GG       | 3 (1.0)             | 2 (1.4)         | 1.3 (0.2-8.1); 0.751       | 0.4 (0.1-4.8); 0.469  |
| <b><i>DRD2</i><sup>‡</sup></b>   |          |                     |                 |                            |                       |
| rs1799978 (T>C)                  | TT or TG | 285 (99.7)          | 141 (98.6)      | 1.00                       | 1.00                  |
|                                  | CC       | 1 (0.3)             | 2 (1.4)         | 4.0 (0.4-45.0); 0.256      | 0.7 (0.1-0.1); 0.999  |
| rs7131056 (C>A)                  | CC or AC | 245 (85.7)          | 115 (80.4)      | 1.00                       | 1.00                  |
|                                  | AA       | 41 (14.3)           | 28 (19.6)       | 1.5 (0.9-2.5); 0.165       | 1.1 (0.6-2.3); 0.701  |
| rs6275 (G>A)                     | GG or AG | 249 (87.1)          | 114 (79.7)      | 1.00                       | 1.00                  |
|                                  | AA       | 37 (12.9)           | 29 (20.3)       | 1.7 (1.0-2.9); 0.049       | 1.9 (1.0-3.7); 0.053  |
| <b><i>CNR1</i><sup>‡</sup></b>   |          |                     |                 |                            |                       |
| rs806380 (A>G)                   | AA or AG | 271 (94.8)          | 135 (94.4)      | 1.00                       | 1.00                  |
|                                  | GG       | 15 (5.2)            | 8 (5.6)         | 1.1 (0.4-2.6); 0.880       | 1.4 (0.4-4.6); 0.575  |
| rs806379 (A>T)                   | AA or AT | 240 (83.9)          | 113 (79.0)      | 1.00                       | 1.00                  |
|                                  | TT       | 46 (16.1)           | 30 (21.0)       | 1.4 (0.8-2.3); 0.212       | 2.4 (1.2-4.7); 0.009  |

|                  |                |                         |                         |                              |                               |
|------------------|----------------|-------------------------|-------------------------|------------------------------|-------------------------------|
| rs1049353 (C>T)  | CC or CT<br>TT | 276 (96.5)<br>10 (3.5)  | 140 (98.6)<br>2 (1.4)   | 1.00<br>0.4 (0.1-1.8); 0.394 | 1.00<br>0.7 (0.1-4.5); 0.732  |
| rs6454674 (T>G)  | TT or GT<br>GG | 254 (88.8)<br>32 (11.2) | 129 (90.2)<br>14 (9.8)  | 1.00<br>1.0 (0.4-1.7); 0.659 | 1.00<br>0.9 (0.4-2.0); 0.820  |
| rs1535255 (T>G)  | TT or GT<br>GG | 277 (96.9)<br>9 (3.1)   | 134 (93.7)<br>9 (6.3)   | 1.00<br>2.1 (0.8-5.3); 0.133 | 1.00<br>3.9 (0.9-16.2); 0.064 |
| rs2023239 (T>C)  | TT or CT<br>CC | 277 (96.9)<br>9 (3.1)   | 135 (94.4)<br>8 (5.6)   | 1.00<br>1.8 (0.7-4.8); 0.227 | 1.00<br>3.7 (0.9-15.7); 0.077 |
| rs12720071 (T>C) | TT or TC<br>CC | 283 (99.0)<br>3 (1.0)   | 142 (99.3)<br>1 (0.7)   | 1.00<br>0.7 (0.1-6.4); 0.724 | 1.00<br>0.4 (0.1-5.9); 0.539  |
| rs6928499 (G>C)  | GG or GC<br>CC | 278 (97.2)<br>8 (2.8)   | 135 (94.4)<br>8 (5.6)   | 1.00<br>2.1 (0.8-5.6); 0.157 | 1.00<br>6.4 (1.2-33.9); 0.028 |
| rs806374 (T>C)   | TT or CT<br>CC | 239 (83.6)<br>47 (16.4) | 117 (81.8)<br>26 (18.2) | 1.00<br>1.1 (0.7-2.0); 0.650 | 1.00<br>0.8 (0.4-1.6); 0.583  |
| rs7766029 (T>C)  | TT or TC<br>CC | 234 (81.8)<br>52 (18.2) | 112 (78.3)<br>31 (21.7) | 1.00<br>1.2 (0.8-2.1); 0.388 | 1.00<br>1.6 (0.9-3.0); 0.110  |
| rs806378 (C>T)   | CC or CT<br>TT | 277 (96.9)<br>9 (3.1)   | 136 (95.1)<br>7 (4.9)   | 1.00<br>1.6 (0.6-4.3); 0.371 | 1.00<br>2.1 (0.6-8.1); 0.278  |
| rs10485170 (T>C) | TT or CT<br>CC | 281 (98.3)<br>5 (1.7)   | 139 (97.2)<br>4 (2.8)   | 1.00<br>1.6 (0.4-6.1); 0.479 | 1.00<br>4.9 (0.6-40.0); 0.141 |
| rs9450898 (T>C)  | TT or CT<br>CC | 277 (96.9)<br>9 (3.1)   | 137 (95.8)<br>6 (4.2)   | 1.00<br>1.3 (0.9-2.0); 0.172 | 1.00<br>4.6 (0.9-24.0); 0.069 |

SNVs = single nucleotide variants; FEPP = first-episode psychosis patients; 1.00 = reference category;  $\beta$  = beta coefficient.

<sup>†</sup> Genotype frequency difference assessed by chi-square test.

<sup>‡</sup> Genotype frequencies analyzed under recessive model (homozygous ancestral + heterozygous versus minor allele homozygous).

<sup>a</sup> Unadjusted: binary logistic regression model including a binary outcome (community-based controls and FEPP). If  $\alpha \leq 0.20$ , to univariate model as significant.

<sup>b</sup> Adjusted: binary logistic regression model including a binary outcome (community-based controls and FEPP).  $\beta$  adjusted by covariates sex, age, first 10 PCs, years of education and tobacco smoking. For multiple test errors, Bonferroni's test was used, and an adjusted p-value < 0.002 (0.05/23 SNVs) was considered statistically significant.



**Table S5** Multifactor dimensionality reduction analysis of gene-environment interactions

| Models of gene-environment interactions in psychosis                                                             | Adj. bal. acc<br>CV training | Adj. bal. acc<br>CV testing | CV<br>consistency | p-value<br>for testing bal. acc |
|------------------------------------------------------------------------------------------------------------------|------------------------------|-----------------------------|-------------------|---------------------------------|
| <b>Lifetime cannabis use (Figure 2A)</b>                                                                         |                              |                             |                   |                                 |
| Lifetime cannabis use                                                                                            | 0.6521                       | 0.6521                      | 10/10             | 0.0010-0.0020                   |
| <b><i>CNR1</i> rs12720071, Lifetime cannabis use</b>                                                             | <b>0.6757</b>                | <b>0.6641</b>               | <b>10/10</b>      | <b>0.0000-0.0010</b>            |
| <i>CNR1</i> rs12720071, <i>GRIN1</i> rs4880213, Lifetime cannabis use                                            | 0.692                        | 0.64                        | 5/10              | 0.0010-0.0020                   |
| <i>CNR1</i> rs806379, <i>CNR1</i> rs7766029, <i>GRIN2B</i> rs890, Lifetime cannabis use                          | 0.7179                       | 0.5818                      | 5/10              | 0.0770-0.0780                   |
| <i>DRD2</i> rs7131056, <i>DRD2</i> rs6275, <i>CNR1</i> rs806374, <i>CNR1</i> rs7766029, Lifetime cannabis use    | 0.7306                       | 0.5599                      | 2/10              | 0.2250-0.2260                   |
| <b>Childhood trauma (Figure 2B)</b>                                                                              |                              |                             |                   |                                 |
| Childhood trauma                                                                                                 | 0.6399                       | 0.6399                      | 10/10             | 0.0010-0.0020                   |
| <b><i>CNR1</i> rs12720071, Childhood trauma</b>                                                                  | <b>0.6549</b>                | <b>0.6206</b>               | <b>6/10</b>       | <b>0.0040-0.0050</b>            |
| <i>CNR1</i> rs7766029, <i>GRIN2A</i> rs11866328, Childhood trauma                                                | 0.6956                       | 0.6171                      | 6/10              | 0.0060-0.0070                   |
| <i>CNR1</i> rs7766029, <i>CNR1</i> rs806378, <i>GRIN2A</i> rs1420040 Childhood trauma                            | 0.7157                       | 0.5819                      | 2/10              | 0.0780-0.0790                   |
| <i>CNR1</i> rs806374, <i>CNR1</i> rs7766029, <i>GRIN2A</i> rs11866328, <i>GRIN2A</i> rs1420040, Childhood trauma | 0.7275                       | 0.5494                      | 2/10              | 0.3110                          |
| <b>Lifetime cannabis use and childhood trauma (Figure 2C)</b>                                                    |                              |                             |                   |                                 |
| Lifetime cannabis use                                                                                            | 0.6544                       | 0.6066                      | 8/10              | 0.0170                          |
| Childhood trauma, Lifetime cannabis use                                                                          | 0.7028                       | 0.7028                      | 10/10             | 0.000-0.0010                    |
| <b><i>CNR1</i> rs7766029, Childhood trauma, Lifetime cannabis use</b>                                            | <b>0.7249</b>                | <b>0.6929</b>               | <b>8/10</b>       | <b>0.0000-0.0010</b>            |
| <i>DRD2</i> rs7131056, <i>CNR1</i> rs7766029, Childhood trauma, Lifetime cannabis use                            | 0.7432                       | 0.6826                      | 7/10              | 0.0000-0.0010                   |
| <i>DRD2</i> rs7131056, <i>CNR1</i> rs6454674, <i>GRIN2B</i> rs890, Childhood trauma, Lifetime cannabis use       | 0.7502                       | 0.589                       | 2/10              | 0.0490-0.0500                   |

Bal. acc = balance-accuracy; CV = cross-validation.

Multifactor dimensionality reduction analysis for each factor summarizing the average cross-validation consistency, adjusted testing balance accuracy, and the empirical p-value derived from permutation testing (p-values based on 1000 permutations) at the 0.05 significance level.

Best model of gene-environment interaction per analysis that shows a) the minimal prediction error; b) the cross-validation consistency upper of 9 or 10-fold cross validation; c) a significant p-value (less than 0.05); and d) close values of the training and testing balance accuracy (TBA=0.55-0.69) (in bold) as described by Moore (2006).

Results demonstrated as mean p-value.
